# Supplementary material for: Structural properties and strain engineering of a BeB2 monolayer from first-principles
Source: Royal Society of Chemistry journal article supplement (doi:10.1039/c7ra07137j), 2017-01-01
Supplement: c7ra07137j1.pdf [file c7ra07137j1.pdf]

## Supporting Information

# Structural properties and strain engineering of BeB<sub>2</sub> monolayer from first-principles

Fanhao Jia,<sup>a,b</sup> Yuting Qi<sup>a,b</sup>, Shunbo Hu,<sup>a,b</sup> Tao Hu,<sup>a,b</sup> Musen Li,<sup>a,b</sup> Guodong Zhao,<sup>a,b</sup>  
Jihua Zhang,<sup>a,d</sup> Alessandro Stroppa<sup>a,c</sup> and Wei Ren<sup>a,b,\*</sup>

<sup>a</sup> Department of Physics, and International Center of Quantum and Molecular Structures, Shanghai University, Shanghai 200444, China

<sup>b</sup> Materials Genome Institute, and Shanghai Key Laboratory of High Temperature Superconductors, Shanghai University, Shanghai 200444, China

<sup>c</sup> CNR-SPIN c/o Università degli Studi dell'Aquila, Via Vetoio 10, I-67010 Coppito (L'Aquila), Italy

<sup>d</sup> Guizhou Provincial Key Laboratory of Computational Nano-Material Science, Guizhou Education University, Guiyang, 550018, China

\*renwei@shu.edu.cn

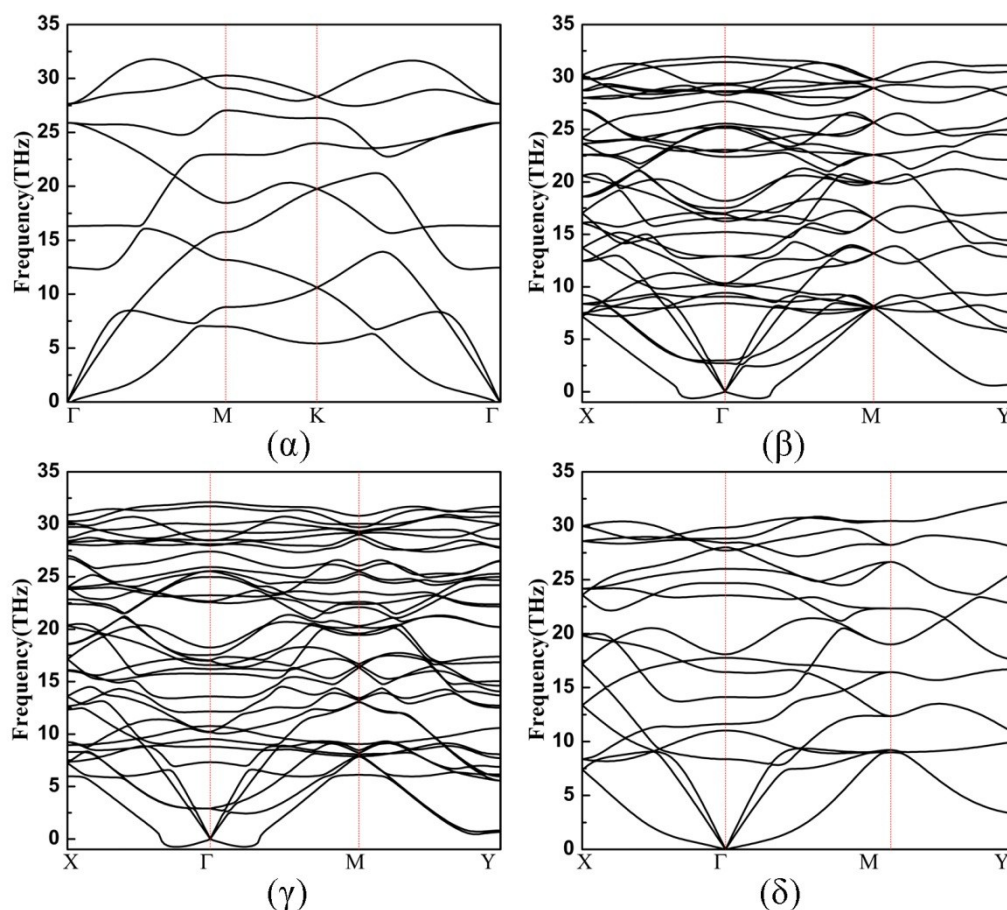

Figure S1. The phonon dispersion curves of the  $\alpha$ ,  $\beta$ ,  $\gamma$  and  $\delta$  phase BeB<sub>2</sub> monolayer.

## Computational details for phonon spectrum

The BeB<sub>2</sub> monolayer was placed in *xy* plane with *z* direction perpendicular to the layer plane and a vacuum slab of 20 Å in *z* direction is included. The unit cells of  $\alpha$ ,  $\beta$ ,  $\gamma$ ,  $\delta$  phases for phonon spectrum calculations are displayed in Figure S2. The red spheres represent Be atoms located below B sheet, while the green spheres represent Be atoms above B sheet. The unit cells of  $\alpha$  contains 3 atoms,  $\delta$  phases contain 6 atoms, whereas  $\beta$  and  $\gamma$  phases contain 12 atoms.

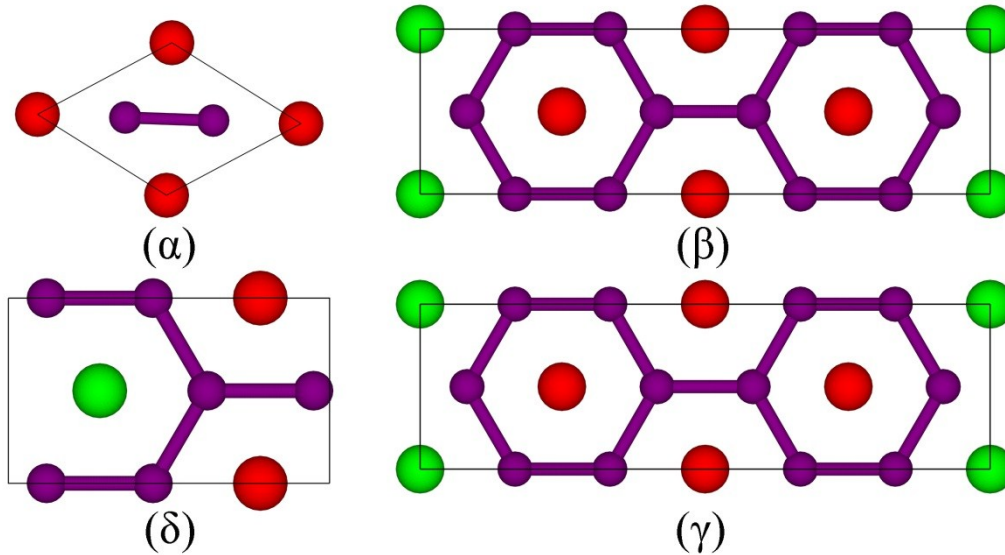

FigureS2. The unit cells of  $\alpha$ ,  $\beta$ ,  $\gamma$ ,  $\delta$  phase BeB<sub>2</sub> monolayers for phonon spectrum calculations.

Phonon dispersion analysis was performed by using the Phonopy code implemented with the density functional perturbation theory (DFPT). The energy cutoff was chosen to be 400 eV. The smearing width of 0.1eV based on the Methfessel-Paxton method was performed. For  $\alpha$  phase, the supercell contains  $5 \times 5 \times 1$  unit cells (25 Be atoms and 50 B atoms), the k-point mesh was  $12 \times 12 \times 1$ , the energy and force precision was set to  $10^{-6}$  eV and  $5 \times 10^{-3}$  eV/Å respectively. For  $\beta$  phase, the supercell contains  $3 \times 2 \times 1$  unit cells (24 Be atoms and 48 B atoms), the k-point mesh was  $12 \times 8 \times 1$ , the energy and force precision was set to  $10^{-6}$  eV and  $1 \times 10^{-3}$  eV/Å respectively. For  $\gamma$  phase, the supercell contains  $3 \times 2 \times 1$  unit cells (24 Be atoms and 48 B atoms), the k-point mesh was  $8 \times 6 \times 1$ , the energy and force precision was set to  $10^{-6}$  eV and  $1 \times 10^{-3}$  eV/Å respectively. For  $\delta$  phase, the supercell contains  $4 \times 4 \times 1$  unit cells (32 Be atoms and 64 B atoms), the k-point mesh was  $10 \times 10 \times 1$ , the energy and force precision was set to  $10^{-7}$  eV and  $1 \times 10^{-3}$  eV/Å respectively.
